# Supplementary material for: An island of stability in a sea of fingers: emergent global features of the viscous-flow instability
Source: Royal Society of Chemistry journal article supplement (doi:10.1039/c5sm00943j), 2015-01-01
Supplement: c5sm00943j1.pdf [file c5sm00943j1.pdf]

## Electronic Supplementary Information

# An island of stability in a sea of fingers: emergent global features of the viscous-flow instability

Irmgard Bischofberger,\* Radha Ramachandran, and Sidney R. Nagel

Received Xth XXXXXXXXXXXX 20XX, Accepted Xth XXXXXXXXXXXX 20XX

First published on the web Xth XXXXXXXXXXXX 200X

DOI: 10.1039/b000000x

The Electronic Supplementary Information consists of two movies.

The movies show fingering patterns resulting from the displacement of a more viscous fluid by a less viscous one for two different viscosity ratios of the inner to the outer fluid,  $\eta_{in}/\eta_{out}$ .

Movie 1:  $\eta_{in}/\eta_{out} = 0.0033$  ( $\eta_{out} = 296.7$  mPa s,  $\eta_{in} = 0.99$  mPa s)

Movie 2:  $\eta_{in}/\eta_{out} = 0.42$  ( $\eta_{out} = 530.3$  mPa s,  $\eta_{in} = 224.4$  mPa s)

For both experiments, the colorless outer fluid is a silicone oil and the dyed inner fluid is a glycerol-water mixture. In both cases the viscosity difference  $\Delta\eta \equiv \eta_{out} - \eta_{in}$ , the plate separation  $b$ , the volumetric flow rate  $q$  and the interfacial tension  $\sigma$  are the same:  $\Delta\eta = 300 \pm 6$  mPa s,  $b = 254$   $\mu$ m,  $q = 10$  ml/min,  $\sigma = 26.5 \pm 2.5$  mN/m. The obvious difference, the length of the fingers compared to the radius of the inner region of complete displacement, is due only to the change in the viscosity ratio:  $\eta_{in}/\eta_{out}$ .

<sup>a</sup> The James Franck and Enrico Fermi Institutes and The Department of Physics, The University of Chicago, Chicago, Illinois 60637, USA. Tel: +1 773 702 7204; E-mail: [ibischofberger@uchicago.edu](mailto:ibischofberger@uchicago.edu)
